# Supplementary material for: IL-17A is essential to the development of elastase-induced pulmonary inflammation and emphysema in mice
Source: PubMed Central journal article supplement (PMC3564829; doi:10.1186/1465-9921-14-5), 2013-01-20
Supplement: 1465-9921-14-5-S1.pdf [file 1465-9921-14-5-S1.pdf]

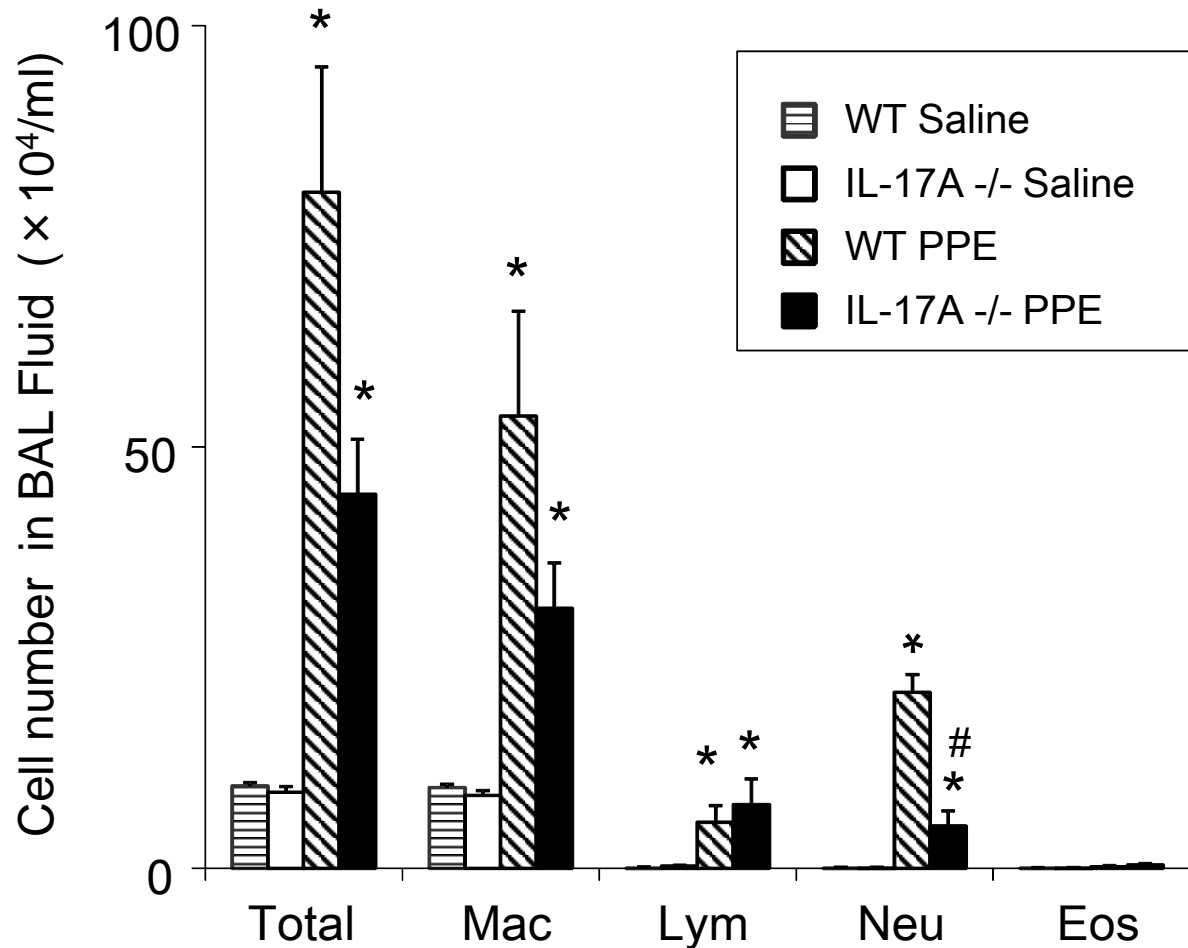

Cellular composition in BAL fluid on day 2 after intratracheal instillation of PPE or saline. \* $p < 0.05$  compared to WT saline and IL-17A<sup>-/-</sup> saline. # $p < 0.05$  versus WT PPE.  $n = 8$  in each group.
